# Supplementary material for: Inactivation of particle-associated Escherichia coli with chlorine dioxide
Source: Oxford University Press journal article supplement (doi:10.2166/ws.2016.121), 2016-07-26
Supplement: ws2016121supp.doc [file ws2016121supp.doc]

**SUPPLEMENTARY MATERIAL**

**Table S1 | Water quality characteristics of raw water during the experiment**

| **Water quality parameter** | **Units** | **Value** |
| --- | --- | --- |
| pH | – | 7–7.5 |
| Turbidity | NTU | 8–15 |
| UV254 | Cm–1 | 0.0026–0.036 |
| DOC | mg/L | 2.85–3.61 |
| CODMn | mg/L | 2.01–2.27 |
| TN | mg/L | 2.55–3.01 |
| NH4+-N | mg/L | 0.25–0.41 |
| NO3--N | mg/L | 1.7–2.0 |

The raw water was characterized by high DOC concentration and turbidity, with slightly elevated levels of UV254, as presented in Table S1.


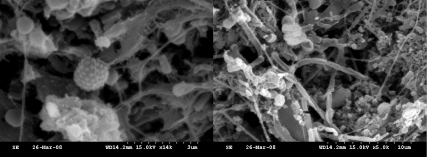


a

b

**Figure S1 |** The SEM result of GAC particle before *E. coli* (a), after *E. coli* associated (b).

Comparing Figure S1 (a) and (b), it can be seen that there were many small spots increasing the density of Figure S1(b), therefore the results show the effective attachment of *E. coli* to particles.

**Table S2 | The effect of independent variables on the disinfection efficiency (%)**

| **Run** | **A: ClO2 dosage** | **B: Exposure time** | **C: Particle concentration** | **Disinfection efficiency (%)** |
| --- | --- | --- | --- | --- |
| 1 | −1.00 | −1.00 | 1.00 | 37.4 |
| 2 | 0.00 | 0.00 | 0.00 | 72.6 |
| 3 | 0.00 | −1.00 | 0.00 | 62.9 |
| 4 | 0.00 | 0.00 | 0.00 | 76.9 |
| 5 | −1.00 | 0.00 | 0.00 | 46.3 |
| 6 | 0.00 | 0.00 | 1.00 | 66.2 |
| 7 | 0.00 | 1.00 | 0.00 | 80.3 |
| 8 | 1.00 | 1.00 | 1.00 | 54.7 |
| 9 | 1.00 | 1.00 | −1.00 | 88.7 |
| 10 | 1.00 | 0.00 | 0.00 | 83.1 |
| 11 | 1.00 | −1.00 | 1.00 | 47.7 |
| 12 | 0.00 | 0.00 | 0.00 | 75.2 |
| 13 | 0.00 | 0.00 | 0.00 | 74.7 |
| 14 | 0.00 | 0.00 | 0.00 | 77.6 |
| 15 | −1.00 | 1.00 | 1.00 | 45.9 |
| 16 | 0.00 | 0.00 | −1.00 | 86.1 |
| 17 | 1.00 | −1.00 | −1.00 | 78.0 |
| 18 | −1.00 | −1.00 | −1.00 | 50.4 |
| 19 | 0.00 | 0.00 | 0.00 | 72.1 |
| 20 | −1.00 | 1.00 | −1.00 | 52.6 |

As shown in Table S2, the effect of an independent variable on the disinfection efficiency was assessed by developing an experimental matrix in which the treatment groups were designed using the software package Design Expert.
